# Supplementary material for: Analysis of lncRNA-miRNA-mRNA expression pattern in heart tissue after total body radiation in a mouse model
Source: J Transl Med. 2021 Aug 7;19:336. doi: 10.1186/s12967-021-02998-w (PMC8349067; doi:10.1186/s12967-021-02998-w)
Supplement: Supplementary file 4 — Additional file 4: Table S3. Differentially expressed lncRNAs at each dose compared to controls. Each tab corresponds to a specific dose. Columns B through G list the Agilent probe ID, systematic name, p-value, Benjamini–Hochberg adjusted p-value, B statistic, and the average log2FC across samples exposed to the dose, respectively. Probes are listed in order of decreasing significance. [file 12967_2021_2998_MOESM4_ESM.xlsx]

## Sheet: 1 Gy
	Agilent ID	Systematic Name	Probe Sequence	p-value	adjusted p-value	B statistic	log2(FC)
1	A_30_P01019027	chr1:44922628-44923224_F	TGTTTTAGTCACAAGTGTGACTAATATCTAATATTAAGCTTGTTTCTGTCACTGTGTCCC	3.27132e-06	0.00179127	4.42444	3.16105
2	A_30_P01018656	chr17:22420025-22457650_F	AAGGTCCTGCTCTTGCCGTTATCCCTGCCCCGGGGATTCCATTCCCTCCCGCTCAGTCAT	1.04048e-05	0.00342269	3.36189	-1.03846
3	A_30_P01021863	chr10:69819062-69871640_F	TTATGTAGAATGGTCCGTTACCACCTCGCTGACATTTGCTGGTGCCCTGTCTAGTTTACG	2.1234e-05	0.00516162	2.70696	-1.81263
4	A_30_P01020960	chr17:29183003-29217681_R	GGTGTCTGAACAGTTGAAGCTTCCTTGGTGTAGATCAAAACTGGCCAAACACTGGTGATT	9.03943e-05	0.0135316	1.37889	1.47042
5	A_55_P2322104	NR_045742	TTATCTACATTCAGCGGAATTCAAATGTACTGTCTGAATGATCCAGACATACCCAAAAAA	0.000149663	0.019268	0.917716	1.07167

## Sheet: 2 Gy
	Agilent ID	Systematic Name	Probe Sequence	p-value	adjusted p-value	B statistic	log2(FC)
1	A_55_P2167645	NR_045001	TTTCAAGCCTAGAACACATTTTACGGAATCTGACTGAGCCACCACCCTGATAGTTTTGCC	6.42014e-08	9.90587e-05	7.9693	-2.45327
2	A_52_P91658	NR_045989	AGAGACTTGTCCTAGTTACTTCCAGATGGATAAGCCAGCTATGATGTGACCTCGCTAAGT	2.26944e-07	0.000254644	6.82778	1.55162
3	A_30_P01021863	chr10:69819062-69871640_F	TTATGTAGAATGGTCCGTTACCACCTCGCTGACATTTGCTGGTGCCCTGTCTAGTTTACG	3.72096e-07	0.000360232	6.37968	-2.28981
4	A_30_P01018656	chr17:22420025-22457650_F	AAGGTCCTGCTCTTGCCGTTATCCCTGCCCCGGGGATTCCATTCCCTCCCGCTCAGTCAT	4.79448e-06	0.00278497	4.05622	-1.08865
5	A_30_P01020960	chr17:29183003-29217681_R	GGTGTCTGAACAGTTGAAGCTTCCTTGGTGTAGATCAAAACTGGCCAAACACTGGTGATT	1.05942e-05	0.00439767	3.33418	1.70202
6	A_55_P2051254	NR_003368	CCTTTGCTCATCTGTGTAATGCTCAATAAATGTAAATTGAACCCTGAATGAGGGACAATG	4.10935e-05	0.0124476	2.09992	1.05827
7	A_30_P01033314	chr13:70745633-70776516_R	TTTCCAGAGACAGAAAAATCTCCATGTCTAACATTGCTGACCCTCCACCCAGGAGCATTT	0.000210746	0.0346845	0.61495	-1.07255

## Sheet: 4 Gy
	Agilent ID	Systematic Name	Probe Sequence	p-value	adjusted p-value	B statistic	log2(FC)
1	A_30_P01021863	chr10:69819062-69871640_F	TTATGTAGAATGGTCCGTTACCACCTCGCTGACATTTGCTGGTGCCCTGTCTAGTTTACG	1.63151e-08	1.49174e-05	9.41378	-2.65895
2	A_55_P2167645	NR_045001	TATTCTCTGTGATGTCAGTGACCTCAAAGCCTTGGCTAACATGCACAAAAGCCTGGAATG	1.52085e-07	9.04706e-05	7.32591	-2.35341
3	A_30_P01020960	chr17:29183003-29217681_R	CGTTTGTATTCATTTTGTGTGAGTGCATGTGTGTATTTGGGTGCAAATAAAAGCCAAGGG	1.70154e-07	9.88372e-05	7.22073	2.13865
4	A_55_P2051254	NR_003368	TATATCAAGAATATCTTCCTTAATCAGGTCTTGGCTGAGATCAACAAGGAGACTGAAGGC	1.54127e-06	0.000472662	5.15387	1.29617
5	A_55_P2322104	NR_045742	TTATCTACATTCAGCGGAATTCAAATGTACTGTCTGAATGATCCAGACATACCCAAAAAA	2.21703e-06	0.000604771	4.81271	1.41494
6	A_30_P01026869	chr17:79042382-79052046_F	CTTGGAACTATATATTATACTGTAAAAGCAAACAGCACAACACTCGTCAGACTCATCAAC	3.57805e-06	0.000827753	4.36357	1.20558
7	A_66_P103690	NR_030718	AGTGAATTTTTCCAGGGTATGTTCTTGAATTCCCTATTATATTGTAAGAATCTAGAGCTT	6.99428e-06	0.0012467	3.73482	-1.25425
8	A_30_P01027987	chr8:91569369-91594119_F	AGTAAAAAGGCAGAGACTGCTGGCAGGAGCTGCTATGGCACCGTGAGCTGCAGCTGATCT	1.07386e-05	0.00160184	3.33282	-1.01253
9	A_30_P01018760	chr15:79764481-79809909_R	AATCTATTGAGCCATGGGAGATGTTACAATCTTTGAACTTTTAAATAATAATTAATTGTG	1.39136e-05	0.00188211	3.09008	1.35697
10	A_52_P91658	NR_045989	AAACCAGACACAGACAGAGAGAGCACCCAGAAGAAATCAGAGCACAGCCAAACTTCTAAT	3.11553e-05	0.00312021	2.3353	1.16751
11	A_66_P133649	NR_015500	CATGATCGCTTTATCAACTCTCAATGTGTCATCTTCATTGTAAAAGACAATAGGAATTGC	3.40087e-05	0.00327318	2.25333	1.23576
12	A_30_P01025883	chr10:6480075-6603900_F	ACCATACCTTCTCGCTCAAACCTCTGAACACAGTTCCACTTTCAAATGGAAGCTTTTGAA	0.000176379	0.00904315	0.717735	1.37029
13	A_55_P2384248	NR_040545	GTTCCTTTCCCTGGCCACCATGTAGCAATAAACAAGGCTATATGTTTAATAATAAACAAT	0.000238489	0.0106852	0.437406	1.18554
14	A_52_P191210	NR_033299	GAGGACTTTGCAGAGTGACATTTCTGTTTTAAGGGCTTGTATGGAGACCATATTGCTGGC	0.000256987	0.0112387	0.36806	1.12329
15	A_30_P01032701	chr9:82991830-82999937_F	TGAATTGCTCACCTTCGGGATTCTGGTCATGGCAAGAGAAGCGTGGTATCGTCAGCCTGG	0.000385755	0.0140563	-0.00847292	-1.48079
16	A_30_P01031824	chr3:19211659-19213735_F	GAGAGCCATGTCTTCCACCATAGCATGCAGTATTATGTTTTCTGTATTGTTGGGAAGGCA	0.000450029	0.0153876	-0.151088	1.09784
17	A_30_P01029853	chr6:31078802-31079644_R	CTCTGAAACTTACTGGGGCAGGTAAGACATTTGTGTGAGATTTGGCCTGACATGACTTTT	0.000469107	0.01581	-0.189485	1.12367
18	A_52_P271806	NR_015530	CGTGTTTTAAATTGACATGTATTTGTCCAGATTTACAGAGTTCAGCATAGCAAGTTAACG	0.000496509	0.0163322	-0.241968	1.60883
19	A_30_P01028886	chr8:126268510-126290810_F	TTCCTCACCTGGCTTCCTGTGCAGCCTCAGTTTACCACAGTGTCCGTCAATACAAATCCA	0.000650714	0.0191513	-0.491721	1.05119
20	A_30_P01029543	chr2:113880070-113887230_F	CTGTGGTGGGATAGAACAGATTGTGACAGAAAACTAAAAAGTCTCAACCAGAAGAATTAG	0.000920184	0.0237797	-0.810914	-1.36239
21	A_30_P01025122	chr6:31007184-31007725_R	AATGGTTCTCCTCAGATTGCAGAGCACAAACTGACTGATTGATGCCCCAGAACTAATACC	0.00102771	0.0253839	-0.912524	1.25792
22	A_30_P01025509	chr10:74325583-74396665_R	AAACAGATGACTACTCCTAATTCCCCGAACTTCGGGAAATTTTGCTTTGTGTCTTATTTG	0.00156004	0.0325463	-1.29529	1.09401

## Sheet: 8 Gy
	Agilent ID	Systematic Name	Probe Sequence	p-value	adjusted p-value	B statistic	log2(FC)
1	A_30_P01020960	chr17:29183003-29217681_R	GGTGTCTGAACAGTTGAAGCTTCCTTGGTGTAGATCAAAACTGGCCAAACACTGGTGATT	2.41998e-09	2.74482e-06	11.2008	2.5932
2	A_55_P2727286	NR_026688	CGGATCCAGGGCTTAAAGGGGAACTGTCTTTATTCATTAAAAGTGTTGGGCCACTTCTGT	4.24572e-09	4.27813e-06	10.6772	1.23809
3	A_55_P2051254	NR_003368	CCTTTGCTCATCTGTGTAATGCTCAATAAATGTAAATTGAACCCTGAATGAGGGACAATG	2.09715e-08	1.593e-05	9.18587	1.60518
4	A_30_P01033000	chr6:149307300-149322900_R	CTCTGCGGCCTCCGCAGCCTCCACCTCAGCAGCAGTGGTAGCCGCGGCGGCCATTCATTG	4.8169e-08	3.17811e-05	8.40749	2.14463
5	A_55_P2745408	NR_126541	TATTGGGATGTGATGGGAAACTCTGCTGCCCTCTGCAAGTCCAAGAAATCAGACTTTCTC	1.33299e-07	6.85571e-05	7.45326	1.13118
6	A_55_P2167645	NR_045001	TTTCAAGCCTAGAACACATTTTACGGAATCTGACTGAGCCACCACCCTGATAGTTTTGCC	4.28251e-07	0.000177684	6.35767	-2.23388
7	A_30_P01021863	chr10:69819062-69871640_F	TTATGTAGAATGGTCCGTTACCACCTCGCTGACATTTGCTGGTGCCCTGTCTAGTTTACG	8.13574e-07	0.000288988	5.75484	-2.19798
8	A_52_P91658	NR_045989	AGAGACTTGTCCTAGTTACTTCCAGATGGATAAGCCAGCTATGATGTGACCTCGCTAAGT	1.47899e-06	0.000442569	5.19325	1.40618
9	A_66_P133649	NR_015500	CATCTGGGCTCTTTAGGGGTGGCTGAGATGGATACTGTACAAACATGTGGTCCAAAGTGT	1.92348e-06	0.000552149	4.94634	1.47558
10	A_30_P01018656	chr17:22420025-22457650_F	AAGGTCCTGCTCTTGCCGTTATCCCTGCCCCGGGGATTCCATTCCCTCCCGCTCAGTCAT	2.86116e-06	0.000755438	4.57324	-1.12196
11	A_55_P1961302	NR_045893	CTCTGGTGTGTCTGAAGACAGTGATGGTGTACTGACATATATGAAGTAAATAAGTAAATT	3.72517e-06	0.000919632	4.32532	1.13949
12	A_30_P01019966	chr6:119798500-119817050_F	TAGGACGAAAGCCTTGTCTGTGGGGAATTGTTGATGATGTTTGCAGAAATATACTGTGCA	8.70291e-06	0.00171879	3.52844	1.11908
13	A_30_P01021359	chr17:71183978-71185384_F	AAATGAACCTTGGACTTTAAGAACGCTTGGAGTCATTGAACCACACCCAACTCCTATTCT	9.46662e-06	0.00181165	3.44949	1.15735
14	A_30_P01026536	chr1:163508244-163586072_F	TTTGCAGGCTGCTCGTTGGTTTTACAGCCTTCTTGTTTTATTCCTTCTGCATTAAAACTA	4.71242e-05	0.00542357	1.94511	1.07893
15	A_30_P01025143	chr1:163528200-163528398_F	TATTCTCTGTGATGTCAGTGACCTCAAAGCCTTGGCTAACATGCACAAAAGCCTGGAATG	9.71804e-05	0.00869237	1.26874	1.10507
16	A_30_P01028886	chr8:126268510-126290810_F	TTCCTCACCTGGCTTCCTGTGCAGCCTCAGTTTACCACAGTGTCCGTCAATACAAATCCA	0.000233355	0.0155235	0.45273	1.14951
17	A_30_P01019010	chr11:96111499-96126224_R	AGAATCAAAAACCATCTAAGTCTGGGATGCCTTGGATGCCTGTGACATCTCTCCATCTCT	0.000308124	0.0185528	0.194568	1.0668
18	A_55_P2384248	NR_040545	GTTCCTTTCCCTGGCCACCATGTAGCAATAAACAAGGCTATATGTTTAATAATAAACAAT	0.000415156	0.0219997	-0.0818959	1.13098
19	A_30_P01031824	chr3:19211659-19213735_F	GAGAGCCATGTCTTCCACCATAGCATGCAGTATTATGTTTTCTGTATTGTTGGGAAGGCA	0.000511034	0.0246404	-0.274242	1.08546
20	A_30_P01032513	chr1:139806645-139809498_F	GACGGGGTATCACACAGGCTCCTAGAACAAATAAATATAACTGCTTTAAAAATAAACTGT	0.000627666	0.0276207	-0.464263	-1.18794
21	A_30_P01033308	chr3:21964899-21974524_F	TAGTCTCGGAGTTTGTTAGGCTGCACAGTCTATAGCTGTGAAAGTTACTTCAAATGATAC	0.000683659	0.0290991	-0.543165	1.00761
22	A_30_P01025122	chr6:31007184-31007725_R	TGCAAATGCACATCCATCTATAGTCGAACACTTGAGAAGGGTCATGCAGTACCTTCCTGT	0.00154726	0.0462909	-1.29438	1.20682

## Sheet: 12 Gy
	Agilent ID	Systematic Name	Probe Sequence	p-value	adjusted p-value	B statistic	log2(FC)
1	A_55_P2727286	NR_026688	CGGATCCAGGGCTTAAAGGGGAACTGTCTTTATTCATTAAAAGTGTTGGGCCACTTCTGT	9.05693e-13	1.78871e-09	18.6304	1.70901
2	A_30_P01020960	chr17:29183003-29217681_R	GGTGTCTGAACAGTTGAAGCTTCCTTGGTGTAGATCAAAACTGGCCAAACACTGGTGATT	2.66661e-09	1.99486e-06	11.1772	2.58266
3	A_52_P91658	NR_045989	AGAGACTTGTCCTAGTTACTTCCAGATGGATAAGCCAGCTATGATGTGACCTCGCTAAGT	5.52846e-09	3.63949e-06	10.4887	1.8427
4	A_55_P2167645	NR_045001	TTTCAAGCCTAGAACACATTTTACGGAATCTGACTGAGCCACCACCCTGATAGTTTTGCC	1.0568e-08	6.13865e-06	9.87607	-2.66373
5	A_30_P01025368	chr4:116791819-116798263_R	ATAGAAAGCTTTTGTTCATGCAGGCTGTCTTCTGGACATGTGTTCTGCGAGGCAAGCATA	1.66051e-08	8.99008e-06	9.44844	1.10069
6	A_55_P2051254	NR_003368	CCTTTGCTCATCTGTGTAATGCTCAATAAATGTAAATTGAACCCTGAATGAGGGACAATG	3.05072e-08	1.537e-05	8.87238	1.57802
7	A_66_P133649	NR_015500	CATCTGGGCTCTTTAGGGGTGGCTGAGATGGATACTGTACAAACATGTGGTCCAAAGTGT	3.69895e-08	1.74619e-05	8.68982	1.80269
8	A_30_P01021359	chr17:71183978-71185384_F	AAATGAACCTTGGACTTTAAGAACGCTTGGAGTCATTGAACCACACCCAACTCCTATTCT	5.28685e-07	0.000143425	6.16635	1.36334
9	A_30_P01021863	chr10:69819062-69871640_F	TTATGTAGAATGGTCCGTTACCACCTCGCTGACATTTGCTGGTGCCCTGTCTAGTTTACG	7.26306e-07	0.000179303	5.86484	-2.2113
10	A_30_P01018656	chr17:22420025-22457650_F	AAGGTCCTGCTCTTGCCGTTATCCCTGCCCCGGGGATTCCATTCCCTCCCGCTCAGTCAT	1.31556e-05	0.00147627	3.11732	-1.0232
11	A_30_P01021999	chr16:34559623-34560462_R	CAGAAGGTTCTTCAGTTGTGTGGAAGGGTAAAGACATTGATACTTTGTATGATAATATCT	1.662e-05	0.00174224	2.89606	1.21769
12	A_30_P01017774	chr18:61781410-61788685_R	TTGGCTCATAAACAAGGACAAGTACAGGAAAGTGGTACACTCTGCCCGTAGCTCTGACTC	2.53724e-05	0.00235035	2.4959	1.20294
13	A_30_P01026869	chr17:79042382-79052046_F	CTTGGAACTATATATTATACTGTAAAAGCAAACAGCACAACACTCGTCAGACTCATCAAC	5.21276e-05	0.00397797	1.81591	1.01537
14	A_30_P01026167	chr1:163527603-163527999_F	TATATCAAGAATATCTTCCTTAATCAGGTCTTGGCTGAGATCAACAAGGAGACTGAAGGC	5.85699e-05	0.00429983	1.70601	1.11923
15	A_30_P01026536	chr1:163508244-163586072_F	TTTGCAGGCTGCTCGTTGGTTTTACAGCCTTCTTGTTTTATTCCTTCTGCATTAAAACTA	6.80459e-05	0.00469888	1.56464	1.05092
16	A_55_P2729813	NR_027893	CTAAGTAAAGACAGCAGATTCTCCATTTCTTACCGAGGATTTGATTTAAATAAATGTGCC	7.72296e-05	0.00515288	1.44536	1.28973
17	A_30_P01025122	chr6:31007184-31007725_R	TGCAAATGCACATCCATCTATAGTCGAACACTTGAGAAGGGTCATGCAGTACCTTCCTGT	0.000123475	0.00724044	1.00376	1.51156
18	A_30_P01018753	chr7:67111261-67120645_F	CATGATCGCTTTATCAACTCTCAATGTGTCATCTTCATTGTAAAAGACAATAGGAATTGC	0.000146722	0.00804915	0.841663	1.39739
19	A_30_P01018760	chr15:79764481-79809909_R	GAGCCCTGCTTGTCTTGTTCTTGGGTTGGAATTCCCCTTAGGGATAGGGGAATTTCTAGG	0.000150438	0.00818932	0.81817	1.14708
20	A_30_P01029853	chr6:31078802-31079644_R	CTCTGAAACTTACTGGGGCAGGTAAGACATTTGTGTGAGATTTGGCCTGACATGACTTTT	0.000153128	0.00831744	0.801522	1.23389
21	A_30_P01025143	chr1:163528200-163528398_F	TATTCTCTGTGATGTCAGTGACCTCAAAGCCTTGGCTAACATGCACAAAAGCCTGGAATG	0.000214303	0.010497	0.486145	1.03878
22	A_30_P01031350	chr10:69669025-69686275_F	TGGTAGAGCTGTGCTACCTGCTACCTCCTGAGGCTCTCAGGTGAGAACCGGTTTCTCTTG	0.000288998	0.0128203	0.206061	-1.51197
23	A_30_P01033296	chr16:34524589-34573439_R	CATAGCTCTGTACCTGGTTGGCTGGCTGGATTATAAATTTATTCAATTGAACAACTAAAA	0.000413729	0.016342	-0.129314	1.33115
24	A_55_P2257341	NR_037963	AATGGTTCTCCTCAGATTGCAGAGCACAAACTGACTGATTGATGCCCCAGAACTAATACC	0.000475128	0.0181173	-0.258438	-1.0098
25	A_52_P191210	NR_033299	GAGGACTTTGCAGAGTGACATTTCTGTTTTAAGGGCTTGTATGGAGACCATATTGCTGGC	0.000626347	0.0215057	-0.51589	1.03909
26	A_30_P01018726	chr10:6497224-6497863_R	TGACTCAGAATAGTCCTTAAGGCCACAGAAAACTAAACAAGGTTAAACGTGACAAGCCTG	0.0021601	0.0481069	-1.66151	1.14659
