# Supplementary material for: Analysis of lncRNA-miRNA-mRNA expression pattern in heart tissue after total body radiation in a mouse model
Source: J Transl Med. 2021 Aug 7;19:336. doi: 10.1186/s12967-021-02998-w (PMC8349067; doi:10.1186/s12967-021-02998-w)
Supplement: Supplementary file 5 — Additional file 5: Table S4. Significantly up- and down-regulated lncRNAs that showed a linear trend across all doses. Table of up- and down-regulated linear, or dose-responsive, lncRNAs. lncRNA symbol (if annotated), systematic name, Benjamini–Hochberg adjusted p-value, B statistic, and the average log2FC across all doses are shown in each table. For unannotated lncRNAs, a BLAT analysis was performed using ensmbl.org and the overlapping transcript, if any, was listed in the table. The asterisk (*) denotes the transcripts identified through BLAT. lncRNAs are listed in order of decreasing significance. [file 12967_2021_2998_MOESM5_ESM.xlsx]

## Sheet: Sheet1
Agilent ID	lncRNA symbol (if annotated)	Systematic Name	Probe Sequence	P-value	B	Average logFC across all doses
A_55_P2727286	Abhd11os	NR_026688	CAGAAGGTTCTTCAGTTGTGTGGAAGGGTAAAGACATTGATACTTTGTATGATAATATCT	7.68622e-09	17.6612	1.36482
A_66_P133649	A530013C23Rik	NR_015500	CATGATCGCTTTATCAACTCTCAATGTGTCATCTTCATTGTAAAAGACAATAGGAATTGC	4.4726e-07	12.9704	1.84747
A_30_P01021359	Gm20703	ENSMUSG00000093622	CTAAGTAAAGACAGCAGATTCTCCATTTCTTACCGAGGATTTGATTTAAATAAATGTGCC	2.72684e-05	7.85401	1.27844
A_55_P2051254	Pvt1	NR_003368	TATATCAAGAATATCTTCCTTAATCAGGTCTTGGCTGAGATCAACAAGGAGACTGAAGGC	4.72025e-05	7.22195	1.42089
A_55_P2729813	BB123696	NR_027893	AAATGAACCTTGGACTTTAAGAACGCTTGGAGTCATTGAACCACACCCAACTCCTATTCT	5.80351e-05	6.96958	1.65604
A_30_P01026167		chr1:163527603-163527999_F	CCTTTGCTCATCTGTGTAATGCTCAATAAATGTAAATTGAACCCTGAATGAGGGACAATG	0.000312168	4.81845	1.13804
A_30_P01020960	Trp53cor1*	chr17:29183003-29217681_R	CGTTTGTATTCATTTTGTGTGAGTGCATGTGTGTATTTGGGTGCAAATAAAAGCCAAGGG	0.000324332	4.74659	2.00654
A_30_P01025143		chr1:163528200-163528398_F	TTTCAAGCCTAGAACACATTTTACGGAATCTGACTGAGCCACCACCCTGATAGTTTTGCC	0.000489719	4.24511	1.19216
A_66_P120320	B430212C06Rik	NR_033214	GAGCCCTGCTTGTCTTGTTCTTGGGTTGGAATTCCCCTTAGGGATAGGGGAATTTCTAGG	0.000518636	4.18028	1.139
A_55_P2257341	2410004I01Rik	NR_037963	TGCAAATGCACATCCATCTATAGTCGAACACTTGAGAAGGGTCATGCAGTACCTTCCTGT	0.000687174	3.82741	-1.11394
A_30_P01021999	Kalrn*	chr16:34559623-34560462_R	CGGATCCAGGGCTTAAAGGGGAACTGTCTTTATTCATTAAAAGTGTTGGGCCACTTCTGT	0.000833507	3.59407	1.07671
A_30_P01033296	Kalrn*	chr16:34524589-34573439_R	TGGTAGAGCTGTGCTACCTGCTACCTCCTGAGGCTCTCAGGTGAGAACCGGTTTCTCTTG	0.0021801	2.38727	1.27619
A_66_P117837	8430426J06Rik	NR_077229	GGTGTCTGAACAGTTGAAGCTTCCTTGGTGTAGATCAAAACTGGCCAAACACTGGTGATT	0.00346455	1.81325	1.17748
A_30_P01031350	Mlrn, linc-RAM *	chr10:69669025-69686275_F	CATAGCTCTGTACCTGGTTGGCTGGCTGGATTATAAATTTATTCAATTGAACAACTAAAA	0.00408001	1.59963	-1.29887
A_30_P01025122		chr6:31007184-31007725_R	AATGGTTCTCCTCAGATTGCAGAGCACAAACTGACTGATTGATGCCCCAGAACTAATACC	0.00524402	1.27711	1.38101
A_55_P2167645		NR_045001	TATTCTCTGTGATGTCAGTGACCTCAAAGCCTTGGCTAACATGCACAAAAGCCTGGAATG	0.00742786	0.830399	-1.79477
A_52_P91658	A930001C03Rik	NR_045989	AAACCAGACACAGACAGAGAGAGCACCCAGAAGAAATCAGAGCACAGCCAAACTTCTAAT	0.00952361	0.493456	1.20883
A_30_P01028589		chr7:134835448-134842613_F	AGAGACTTGTCCTAGTTACTTCCAGATGGATAAGCCAGCTATGATGTGACCTCGCTAAGT	0.0288598	-1.02035	-1.03025
A_30_P01018753		chr7:67111261-67120645_F	CATCTGGGCTCTTTAGGGGTGGCTGAGATGGATACTGTACAAACATGTGGTCCAAAGTGT	0.0312919	-1.13231	1.00303
A_30_P01018760		chr15:79764481-79809909_R	AATCTATTGAGCCATGGGAGATGTTACAATCTTTGAACTTTTAAATAATAATTAATTGTG	0.0444536	-1.60003	1.02839
