# Supplementary material for: Analysis of lncRNA-miRNA-mRNA expression pattern in heart tissue after total body radiation in a mouse model
Source: J Transl Med. 2021 Aug 7;19:336. doi: 10.1186/s12967-021-02998-w (PMC8349067; doi:10.1186/s12967-021-02998-w)
Supplement: Supplementary file 10 — Additional file 10: Table S8. Top 20 probes differentially expressed in a dose dependent manner in the heart samples compared to differentially expressed genes from whole blood collected from the same animals at 48 h timepoint and also compared to Human Coronary Artery Endothelial cells exposed to 10 Gy radiation at 24 h timepoints. [file 12967_2021_2998_MOESM10_ESM.xlsx]

## Sheet: Sheet1
		Gene	Mouse Heart		Mouse Blood		HCAEC
			Ave logFC at all doses	p-value	48h 8 Gy logFC	p-value	SD 24h 10 Gy logFC	p-value
		Cdkn1a	3.05	1.96e-05	5.241	0.00954	2.128	0.0647
		Gdf15	2.908	1.78e-05	-	-	1.648	0.0645
		Hif3a	2.447	0.00192	-	-	-0.426	0.661
		Trp53inp1	2.272	6.72e-09	1.515	0.00973	-	-
		Pmaip1	2.092	8.55e-14	2.43	0.0111	-	-
		Igf1	2.063	7.74e-06	-	-	0.732	0.287
		Ddit4	2.059	0.000303	-	-	2.396	0.0112
		Pip5k1a	2.038	0.000355	1.692	0.00484	-	-
		Zdhhc22	-5.639	5.45e-06	-1.79	0.0149	-	-
		Hbb-b2	-5.619	8.38e-06	-1.457	0.0142	-	-
		Gm9992	-4.557	2e-05	-2.055	0.0147	-	-
		Snca	-2.966	0.0116	-2.013	0.00329	-	-
		Cx3cr1	-2.881	2.24e-10	-2.039	0.0096	-	-
		H2-Ab1	-2.532	2.47e-08	-2.757	0.134	-	-
		H2-Aa	-2.502	5.13e-10	-4.266	0.0749	-	-
